# Supplementary material
Source: PubMed Central journal article supplement (PMC10681040)
Supplement: NIHMS1944191-supplement-2.pdf [file NIHMS1944191-supplement-2.pdf]

| PubChem CID | Average Max % Response | STD Max % Response |
|-------------|------------------------|--------------------|
| 717424      | 84.1                   | 0.1                |
| 2325985     | 70.8                   | 0.5                |
| 2354992     | 62.6                   | 0.3                |
| 2440144     | 73.8                   | 0.1                |
| 5191537     | 69.7                   | 0.3                |
| 2090703     | 59.8                   | 0.6                |
| 2469530     | 61.1                   | 0.4                |
| 5933287     | 66.5                   | 0.8                |
| 17390135    | 78.4                   | 0.4                |
| 5307635     | 62.0                   | 0.6                |
| 45198960    | 78.4                   | 0.2                |
| 45208038    | 75.5                   | 0.2                |
| 2828073     | 84.8                   | 0.3                |
| 1334728     | 79.5                   | 0.2                |
| 1309661     | 80.7                   | 0.2                |
| 972740      | 72.8                   | 0.3                |
| 43814327    | 87.4                   | 0.2                |
| 3158208     | 60.7                   | 0.9                |
| 3616433     | 60.1                   | 0.4                |
| 3236810     | 81.8                   | 0.1                |
| 716774      | 52.9                   | 1.1                |
| 744012      | 68.2                   | 0.5                |
| 725996      | 71.0                   | 0.3                |
| 711450      | 64.0                   | 0.4                |
| 5733427     | 74.8                   | 0.1                |
| 697081      | 72.0                   | 0.0                |
| 46501775    | 85.7                   | 0.1                |
| 126477948   | 71.9                   | 0.1                |
| 46502089    | 69.5                   | 0.2                |
| 5528275     | 76.5                   | 0.4                |
| 802340      | 57.3                   | 0.1                |
| 603321      | 90.7                   | 0.1                |
| 3245307     | 51.3                   | 0.7                |
| 117092635   | 88.1                   | 0.2                |
| 6095772     | 63.9                   | 0.5                |
| 16823177    | 72.4                   | 0.5                |
| 18581303    | 65.1                   | 0.9                |
| 45505583    | 91.7                   | 0.3                |

**Supplementary Table 1:** Active nCDase inhibitors with maximal inhibition >50% at concentrations ~17 uM. Percent inhibition and standard deviations (STD) are shown.
